# Supplementary material for: In silico prediction and structure-based multitargeted molecular docking analysis of selected bioactive compounds against mucormycosis
Source: PubMed Central journal article supplement (PMC8802264; doi:10.1186/s42269-022-00704-4), 2022-01-31
Supplement: 42269_2022_704_MOESM3_ESM.pdf [file 42269_2022_704_MOESM3_ESM.pdf]

**Supplementary Data 1.** Binding affinities of all bioactive compounds with our three target proteins

| S.no | Compounds                                | Pubchem CID | Binding affinity(kcal/mol) with CotH3 | Binding affinity(kcal/mol) with Lanosterol 14 alpha-demethylase | Binding affinity(kcal/mol) with Mucoricin |
|------|------------------------------------------|-------------|---------------------------------------|-----------------------------------------------------------------|-------------------------------------------|
| 1    | Sofosbuvir                               | 45375808    | -6.9                                  | -8.4                                                            | -6.1                                      |
| 2    | Ribavirin                                | 37542       | -6                                    | -6.6                                                            | -5.3                                      |
| 3    | 5,7,4'-Trimethoxy-4-phenylcoumarin       | 12004232    | -5.8                                  | -7.6                                                            | -6.3                                      |
| 4    | Eugenol                                  | 3314        | -4.7                                  | -5.9                                                            | -4.7                                      |
| 5    | Natamycin                                | 5284447     | -8.7                                  | -8.4                                                            | -6.9                                      |
| 6    | Terbinafine                              | 1549008     | -6.4                                  | -6.8                                                            | -5.2                                      |
| 7    | Itraconazole                             | 55283       | -7.3                                  | -9.5                                                            | -6.7                                      |
| 8    | Posaconazole                             | 468595      | -7.8                                  | -9.8                                                            | -6.4                                      |
| 9    | Fluconazole                              | 3365        | -5.9                                  | -7.5                                                            | -5.9                                      |
| 10   | Isavuconazole                            | 6918485     | -6.5                                  | -9.2                                                            | -5.9                                      |
| 11   | Voriconazole                             | 71616       | -6.9                                  | -7.4                                                            | -5.8                                      |
| 12   | Pramiconazole                            | 3013050     | -7.6                                  | -11                                                             | -7.1                                      |
| 13   | Ravuconazole                             | 467825      | -5.7                                  | -9.2                                                            | -6.3                                      |
| 14   | Albaconazole                             | 208952      | -7.4                                  | -9                                                              | -6.3                                      |
| 15   | Zanamivir                                | 60855       | -6                                    | -6                                                              | -5.2                                      |
| 16   | Oseltamivir                              | 65028       | -5.1                                  | -6.8                                                            | -5.2                                      |
| 17   | Peramivir                                | 154234      | -5.6                                  | -7.4                                                            | -5.6                                      |
| 18   | 3,4-Dimethyl-1,5-dihydro-2H-pyrrol-2-one | 574037      | -4.1                                  | -4.6                                                            | -3.7                                      |
| 19   | 3-Epi-Xestoaminol C                      | 90683233    | -3.7                                  | -5.5                                                            | -3.5                                      |
| 20   | Xestoproxamine B                         | 52937783    | -7.6                                  | -8.5                                                            | -6.5                                      |
| 21   | Nakadomarin A                            | 152772052   | -7.6                                  | -10.6                                                           | -6.5                                      |
| 22   | Linalool                                 | 6549        | -5.4                                  | -5                                                              | -4.6                                      |
| 23   | 2,4-Dihydroxychalcone                    | 6433293     | -6.5                                  | -8.1                                                            | -6.2                                      |
| 24   | genistein                                | 5280961     | -6.9                                  | -7.6                                                            | -6.2                                      |
| 25   | Biochanin A                              | 5280373     | -6.4                                  | -7.7                                                            | -6.2                                      |
| 26   | Conocarpan                               | 10999992    | -7.3                                  | -9.1                                                            | -6.8                                      |
| 27   | beta-Eudesmol                            | 91457       | -6                                    | -7.3                                                            | -5.9                                      |
| 28   | thymol                                   | 6989        | -6                                    | -6.1                                                            | -4.8                                      |
| 29   | Carvacrol                                | 10364       | -5.5                                  | -6                                                              | -5.1                                      |
| 30   | 3,5 nonadiyne                            | 185922      | -4.5                                  | -5.5                                                            | -4.4                                      |
| 31   | alpha-Bisabolol                          | 10586       | -5.7                                  | -7.2                                                            | -5.6                                      |
| 32   | Ferutinin                                | 91747167    | -7.1                                  | -8                                                              | -6.3                                      |
| 33   | teferidin                                | 10125942    | -6.4                                  | -8                                                              | -6.2                                      |
| 34   | Borneol                                  | 64685       | -5                                    | -5.7                                                            | -4.3                                      |
| 35   | FLUCYTOSINE                              | 3366        | -4.5                                  | -5.2                                                            | -4.2                                      |
| 36   | Stevensine                               | 11003581    | -6.2                                  | -7.3                                                            | -5.5                                      |
| 37   | Micafungin                               | 477468      | -6.5                                  | -8.8                                                            | -6.2                                      |
| 38   | Dalfopristin                             | 6323289     | -7.6                                  | -7.8                                                            | -6.8                                      |
| 39   | Ent-Manzamine F                          | 6474731     | -8.2                                  | -8.4                                                            | -7.4                                      |
| 40   | Olorofim                                 | 91885568    | -8.6                                  | -9.6                                                            | -7.4                                      |
| 41   | Fosmanogepix                             | 44123754    | -7.7                                  | -9.4                                                            | -6.6                                      |

|    |                                   |           |      |       |      |
|----|-----------------------------------|-----------|------|-------|------|
| 42 | Quercetin                         | 5280343   | -6.3 | -8.3  | -6.3 |
| 43 | beta-Sitosterol                   | 222284    | -7.5 | -8.7  | -6.6 |
| 44 | 6-Deacetylningbin                 | 10505484  | -7.1 | -6.9  | -6.5 |
| 45 | Azadiradione                      | 12308714  | -6.9 | -8.6  | -6.4 |
| 46 | Nimbin                            | 108058    | -6.2 | -6.8  | -5.9 |
| 47 | Salannin                          | 6437066   | -6.9 | -6.8  | -5.8 |
| 48 | Epoxyazadiradione                 | 49863985  | -7   | -9.9  | -6.2 |
| 49 | Nimonol                           | 73356511  | -6.3 | -7.7  | -6.3 |
| 50 | Meliantriol                       | 46173826  | -7.5 | -8.7  | -6.3 |
| 51 | Allicin                           | 65036     | -3.4 | -3.9  | -3.2 |
| 52 | Allyl isothiocyanate              | 5971      | -3.3 | -3    | -2.5 |
| 53 | S-Methyl<br>methanesulfinothioate | 95200     | -2.7 | -3    | -2.5 |
| 54 | Diallyl disulfide                 | 16590     | -3   | -3.6  | -3.2 |
| 55 | Ajoene                            | 5386591   | -3.6 | -4.3  | -3.6 |
| 56 | 2-Vinyl-4H-1,3-dithiine           | 133337    | -4.5 | -4.1  | -3.4 |
| 57 | 3-Vinyl-4H-1,2-dithiin            | 150636    | -4.7 | -4.4  | -3.4 |
| 58 | Phlorofucofuroeckol A             | 130976    | -8   | -8.9  | -7.5 |
| 59 | 7-O-Methylkoninginin D            | 46833400  | -6.2 | -7    | -5.4 |
| 60 | Geraniol                          | 637566    | -4.5 | -5.5  | -4.3 |
| 61 | Sordarin                          | 485851    | -6.7 | -7.1  | -6.1 |
| 62 | Griseofulvin                      | 441140    | -5.7 | -7    | -5.9 |
| 63 | morpholine                        | 8083      | -3.5 | -3.4  | -3.2 |
| 64 | Nikkomyacin z                     | 456557    | -7   | -7.9  | -6.2 |
| 65 | Papulacandins                     | 6450326   | -7   | -8.6  | -5.6 |
| 66 | Stelletin A                       | 5352083   | -7.4 | -8.2  | -7.8 |
| 67 | Cycloeudesmol                     | 442362    | -5.7 | -6.8  | -5   |
| 68 | laurinterol                       | 11471955  | -6.9 | -7.2  | -5.7 |
| 69 | Debromolaurinterol                | 466442    | -6.8 | -7.7  | -5.8 |
| 70 | parsiguine                        | 153274516 | -9.2 | -10.1 | -8.2 |
| 71 | Elatol                            | 479931    | -5.5 | -5.9  | -5.1 |
| 72 | Karatungiol                       | 101397831 | -5.2 | -6.6  | -4.1 |
| 73 | 9H-Pyrido[3,4-B]indole            | 64961     | -7.4 | -6.5  | -5.5 |
| 74 | Deschloroelatol                   | 479932    | -5.8 | -7.9  | -5.1 |
| 75 | Loliolide                         | 100332    | -6.8 | -6.5  | -4.9 |
| 76 | beta-Cyclocitral                  | 9895      | -4.7 | -5.6  | -4.3 |
| 77 | Neophytadiene                     | 10446     | -3.8 | -5.2  | -4.3 |
| 78 | Lasiodiplodin                     | 14562696  | -5.9 | -7.9  | -5.5 |
| 79 | Tolnaftate                        | 5510      | -7.1 | -7.9  | -6.6 |
| 80 | Undecylenic acid                  | 5634      | -4.1 | -5    | -4   |
| 81 | Miconazole                        | 4189      | -6.7 | -7.9  | -6.1 |
| 82 | Clotrimazole                      | 2812      | -6.9 | -8.3  | -5.8 |
| 83 | Sclerotiotide A                   | 46849843  | -5.9 | -7.1  | -6.2 |
| 84 | Butenafine                        | 2484      | -7.6 | -7.8  | -5.7 |
| 85 | Bifonazole                        | 2378      | -8   | -9.5  | -6.9 |
| 86 | Terconazole                       | 441383    | -7.2 | -8.7  | -6.9 |
| 87 | Ciclopirox                        | 2749      | -5.4 | -6.4  | -5   |
| 88 | Haloprogin                        | 3561      | -4.3 | -4.2  | -4   |
| 89 | Tioconazole                       | 5482      | -6.3 | -7.2  | -5.6 |
| 90 | Miltefosine                       | 3599      | -4.7 | -4.9  | -4.3 |

|     |                             |           |      |      |      |
|-----|-----------------------------|-----------|------|------|------|
| 91  | Sulconazole                 | 5318      | -7.1 | -7.2 | -6.1 |
| 92  | Ketoconazole                | 456201    | -7.1 | -8.5 | -6.3 |
| 93  | Manzamine A                 | 6509753   | -8.1 | -9   | -8.3 |
| 94  | Efinaconazole               | 489181    | -7.1 | -7.6 | -5.6 |
| 95  | Butoconazole                | 47472     | -6.4 | -7.3 | -5.7 |
| 96  | Dimazole                    | 8708      | -4.9 | -6.6 | -4.5 |
| 97  | Manoalide                   | 6437368   | -7   | -8.6 | -6.2 |
| 98  | Chloroxine                  | 2722      | -5.5 | -6.1 | -5.1 |
| 99  | Oxiconazole                 | 5353853   | -6.5 | -7.4 | -6.2 |
| 100 | Xestodecalactone B          | 9943580   | -6.9 | -6.7 | -6.2 |
| 101 | Chloroxylenol               | 2723      | -5   | -5.5 | -4.6 |
| 102 | Amorolfine                  | 54260     | -6.3 | -7.2 | -6.2 |
| 103 | T-2307                      | 9803135   | -6.4 | -7.5 | -5.2 |
| 104 | Econazole                   | 3198      | -6.7 | -7.9 | -6.1 |
| 105 | Clove oil                   | 105755    | -5.8 | -6.8 | -5.3 |
| 106 | Fleroxacin                  | 3357      | -6.4 | -7.4 | -6.1 |
| 107 | Pyrithione                  | 1570      | -4.7 | -4.4 | -3.7 |
| 108 | Vialinin B                  | 16049791  | -8.9 | -7.8 | -6.5 |
| 109 | Levoketoconazole            | 47576     | -7.5 | -8.5 | -6.8 |
| 110 | Hexetidine                  | 3607      | -5.4 | -6   | -4.7 |
| 111 | Hydroxystilbamidine         | 5284571   | -6.5 | -7.6 | -6.1 |
| 112 | Methylchloroisothiazolinone | 33344     | -4.6 | -4.3 | -3.2 |
| 113 | Quilseconazole              | 91886002  | -7.7 | -8.1 | -7.6 |
| 114 | Isavuconazonium             | 6918606   | -4.7 | -7.8 | -6.4 |
| 115 | Pentamidine                 | 4735      | -6.3 | -5.6 | -5.1 |
| 116 | Dipyrrithione               | 3109      | -5.8 | -6.9 | -5.4 |
| 117 | Salicylic acid              | 338       | -6.4 | -5.4 | -4.6 |
| 118 | Clioquinol                  | 2788      | -5.2 | -5.9 | -5.1 |
| 119 | Naftifine                   | 47641     | -6.3 | -7.8 | -6   |
| 120 | Gentian Violet              | 11057     | -6.5 | -7.5 | -6.4 |
| 121 | Isoconazole                 | 3760      | -6.5 | -8   | -5.8 |
| 122 | Sertaconazole               | 65863     | -7   | -7.7 | -6.5 |
| 123 | Luliconazole                | 3003141   | -5.8 | -7.8 | -5.5 |
| 124 | Streptomycin                | 19649     | -6.7 | -6.4 | -5.7 |
| 125 | Dequalinium                 | 2993      | -7.1 | -6.9 | -5.9 |
| 126 | Chlorophetanol              | 15907     | -4.1 | -4.8 | -4.4 |
| 127 | Potassium iodate            | 23665710  | -4.4 | -4.4 | -3.9 |
| 128 | Capric acid                 | 2969      | -4.1 | -4.6 | -4   |
| 129 | Benzethonium                | 2335      | -5.4 | -7.6 | -4.7 |
| 130 | Oteseconazole               | 77050711  | -7.7 | -8.6 | -6.9 |
| 131 | VT-1598                     | 126715974 | -6.6 | -7.5 | -6.3 |
| 132 | Bafilomycin A1              | 6436223   | -7   | -7.9 | -6.4 |
| 133 | Allosamidin                 | 119339    | -5.8 | -7.7 | -6.1 |
| 134 | Salicylhydroxamic Acid      | 66644     | -6.7 | -6   | -5.2 |
| 135 | Trichostatin A              | 444732    | -7.2 | -6.8 | -5.5 |
| 136 | Pyroquilon                  | 91665     | -5.2 | -6.5 | -4.9 |
| 137 | Abafungin                   | 159326    | -7.7 | -7.9 | -6.7 |
| 138 | Cerulenin                   | 5282054   | -4.9 | -5.5 | -4.8 |
| 139 | Pyrrolnitrin                | 13916     | -5.3 | -6.5 | -5   |

|     |                            |          |      |       |      |
|-----|----------------------------|----------|------|-------|------|
| 140 | Triclosan                  | 5564     | -5.1 | -5.8  | -5.7 |
| 141 | Triacetin                  | 5541     | -4.4 | -5.3  | -4.2 |
| 142 | Pentamycin                 | 5282200  | -6.3 | -8.2  | -6.2 |
| 143 | Triclocarban               | 7547     | -6.1 | -8    | -6.3 |
| 144 | Radicol                    | 6323491  | -6.9 | -8.7  | -6.6 |
| 145 | Pecilocin                  | 5282176  | -5.8 | -7    | -5.8 |
| 146 | Troclosene                 | 16726    | -5.1 | -5.8  | -4   |
| 147 | Tolciclate                 | 5506     | -6.9 | -9    | -6.2 |
| 148 | Nitroxoline                | 19910    | -6.5 | -6.5  | -4.8 |
| 149 | Icofungipen                | 216240   | -7.4 | -9.2  | -6.4 |
| 150 | Sinefungin                 | 65482    | -7.2 | -6.7  | -6   |
| 151 | Myxothiazol                | 10972974 | -6   | -6.4  | -5.6 |
| 152 | Flutrimazole               | 3401     | -6.7 | -8.1  | -5.8 |
| 153 | Cordycepin                 | 6303     | -5.3 | -6.5  | -5.4 |
| 154 | Lys-Nva-FMDP               | 6475796  | -5.7 | -5.9  | -5.4 |
| 155 | Fenticonazole              | 51755    | -7   | -8.7  | -6.6 |
| 156 | Omoconazole                | 3033988  | -6.4 | -6.4  | -6.4 |
| 157 | Lawsone                    | 6755     | -5.5 | -6.9  | -5.6 |
| 158 | Nifuratel                  | 6433427  | -5.3 | -6.3  | -5.4 |
| 159 | Mevastatin                 | 64715    | -6.8 | -7.4  | -6.1 |
| 160 | Wortmannin                 | 312145   | -6.8 | -8.6  | -6.1 |
| 161 | Tea tree oil               | 22833361 | -3.6 | -4.4  | -3.9 |
| 162 | Flindersine                | 68230    | -6.4 | -8    | -6.2 |
| 163 | syn-2869                   | 490657   | -8.2 | -9.4  | -7   |
| 164 | 5-Epi-Ilimaquinone         | 21727418 | -6.7 | -8.7  | -6   |
| 165 | Azoxystrobin               | 3034285  | -6.7 | -7    | -6   |
| 166 | Fumagillin                 | 6917655  | -5.9 | -6.9  | -5.7 |
| 167 | Motualevic acid A          | 25242622 | -5.5 | -6.2  | -4.4 |
| 168 | Agelasine A                | 10072839 | -7.7 | -7.7  | -6.2 |
| 169 | Agelasine B                | 6439899  | -7.9 | -9.1  | -6.5 |
| 170 | (+)-Kalihinol A            | 185105   | -7   | -8.9  | -6.1 |
| 171 | Phyllofenone B             | 23426940 | -7.7 | -8.2  | -7.4 |
| 172 | Moxifloxacin               | 152946   | -7.2 | -7.2  | -6.2 |
| 173 | Eurysterol A               | 23706901 | -6.5 | -7.7  | -6.2 |
| 174 | 5alpha-Cholestane          | 2723895  | -6.8 | -8.5  | -6.3 |
| 175 | Eurysterol A sulfonic acid | 16681436 | -6.6 | -7.5  | -6.2 |
| 176 | Eurysterol B               | 23706902 | -6.7 | -9.4  | -6.6 |
| 177 | Eurysterol B sulfonic acid | 16681438 | -7.3 | -9.3  | -6.6 |
| 178 | Geodisterol-O-sulfite      | 44254699 | -7.5 | -8.6  | -6.8 |
| 179 | Heteronemin                | 21589810 | -7.6 | -7.4  | -6.6 |
| 180 | Heteronemin acetate        | 21589811 | -8   | -8.1  | -6.5 |
| 181 | Fascioquinol A             | 53233477 | -8.2 | -9.3  | -6.8 |
| 182 | Benzosceptrin C            | 44598334 | -7.4 | -9.1  | -6.9 |
| 183 | Chebulic acid              | 71308174 | -6   | -6.2  | -5.7 |
| 184 | Oroidin                    | 6312649  | -5.7 | -6.3  | -5.3 |
| 185 | Bromoageliferin            | 15816051 | -6.7 | -7.8  | -6.5 |
| 186 | Alisiaquinol               | 24970869 | -7.5 | -8.7  | -7   |
| 187 | Alisiaquinone A            | 24970867 | -7.3 | -9.1  | -7   |
| 188 | Plakinamine A              | 21606893 | -7.7 | -10.4 | -7.2 |

|     |                                                                                                                                                                    |           |      |       |      |
|-----|--------------------------------------------------------------------------------------------------------------------------------------------------------------------|-----------|------|-------|------|
| 189 | Ceratinadin A                                                                                                                                                      | 49863115  | -7.9 | -8.9  | -6.7 |
| 190 | Fasciospongine A                                                                                                                                                   | 16755903  | -6.6 | -9    | -6.5 |
| 191 | Haliclonin A                                                                                                                                                       | 101462407 | -7.7 | -8.6  | -6.7 |
| 192 | Halicyclamine A                                                                                                                                                    | 10479489  | -7.8 | -9.1  | -8.2 |
| 193 | Haliclonacyclamine A                                                                                                                                               | 102423951 | -7.8 | -8.7  | -6.9 |
| 194 | Ethylhexylglycerin                                                                                                                                                 | 9859093   | -4.4 | -5    | -4.2 |
| 195 | oceanapamine                                                                                                                                                       | 10313635  | -6.2 | -6.8  | -5.4 |
| 196 | Topsentin                                                                                                                                                          | 72457     | -8.1 | -9.7  | -7.1 |
| 197 | Nephalsterol B                                                                                                                                                     | 463812    | -6.6 | -7.7  | -6.3 |
| 198 | Aerothionin                                                                                                                                                        | 10919908  | -6.9 | -7    | -6.4 |
| 199 | (-)-Agelasidine C                                                                                                                                                  | 5467446   | -6.7 | -7.3  | -5.7 |
| 200 | Goniodomin A                                                                                                                                                       | 6440832   | -7.7 | -9.5  | -8   |
| 201 | Trichoderin A                                                                                                                                                      | 46891555  | -6.2 | -6.4  | -4.7 |
| 202 | Demethoxycurcumin                                                                                                                                                  | 5469424   | -6.7 | -7    | -5.4 |
| 203 | Bisdemethoxycurcumin                                                                                                                                               | 5315472   | -6.7 | -7.6  | -6.6 |
| 204 | (5R,6R)-7,9-Dibromo-6-hydroxy-8-methoxy-N-[2-[1-(3,5,8-trihydroxy-4-oxo-1H-quinolin-6-yl)imidazol-4-yl]ethyl]-1-oxa-2-azaspiro[4.5]deca-2,7,9-triene-3-carboxamide | 46911279  | -8.2 | -9    | -6.5 |
| 205 | Ceratinadin B                                                                                                                                                      | 49863116  | -7.6 | -8.9  | -7.6 |
| 206 | Ceratinadin C                                                                                                                                                      | 49863117  | -5.7 | -7.7  | -6.1 |
| 207 | Avarol                                                                                                                                                             | 72185     | -6.8 | -7.3  | -6.6 |
| 208 | Avarone                                                                                                                                                            | 72186     | -7.1 | -8.4  | -6.4 |
| 209 | Fascioquinol E                                                                                                                                                     | 10600155  | -6.8 | -7.2  | -5.6 |
| 210 | Fascioquinol C                                                                                                                                                     | 53328564  | -7.9 | -10.4 | -7.2 |
| 211 | Fascioquinol F                                                                                                                                                     | 67831571  | -7.4 | -8.3  | -6.4 |
| 212 | Fascioquinol B                                                                                                                                                     | 53233589  | -7.1 | -9.5  | -6.7 |
| 213 | Fascioquinol D                                                                                                                                                     | 53328565  | -7.8 | -10.8 | -7.2 |
| 214 | Topsentin D                                                                                                                                                        | 12018820  | -7.5 | -9.5  | -7.1 |
| 215 | Bromotopsentin                                                                                                                                                     | 183528    | -8   | -9.3  | -7.2 |
| 216 | Topsentine                                                                                                                                                         | 44416636  | -7.8 | -9.1  | -7.7 |
| 217 | Deoxytopsentin                                                                                                                                                     | 183527    | -8.5 | -9.5  | -7.2 |
| 218 | Woodylide A                                                                                                                                                        | 71720654  | -5.7 | -6.3  | -4.7 |
| 219 | Clathric acid                                                                                                                                                      | 102486003 | -6.7 | -7.2  | -5.9 |
| 220 | Metachromin A                                                                                                                                                      | 10473589  | -6.6 | -7.7  | -6.2 |
| 221 | Mamanuthaquinone                                                                                                                                                   | 11969939  | -6.7 | -7.6  | -5.8 |
| 222 | Hymendin                                                                                                                                                           | 6439099   | -5.9 | -6    | -5.4 |
| 223 | Palauolide                                                                                                                                                         | 13859138  | -7.7 | -8.2  | -7   |
| 224 | Clathrodin                                                                                                                                                         | 5388709   | -5.7 | -6.2  | -5.3 |
| 225 | Sventrin                                                                                                                                                           | 10938301  | -5.8 | -7.1  | -5.4 |
| 226 | Stachybogrisephenone B                                                                                                                                             | 139583964 | -7.2 | -6.9  | -6.1 |
| 227 | Latrunculin B                                                                                                                                                      | 6436219   | -7   | -9.3  | -6.5 |
| 228 | Tirandamycin A                                                                                                                                                     | 54706137  | -6.6 | -8.4  | -6.8 |
| 229 | Kuchinoenamine                                                                                                                                                     | 136870410 | -6.4 | -8    | -5.7 |
| 230 | Botryorhodine D                                                                                                                                                    | 42637419  | -6.4 | -7.8  | -6.2 |
| 231 | Nakijiquinone H                                                                                                                                                    | 44586960  | -6.7 | -7.1  | -6.4 |

|     |                                                                                                                                                 |           |      |       |      |
|-----|-------------------------------------------------------------------------------------------------------------------------------------------------|-----------|------|-------|------|
| 232 | Smenospongine                                                                                                                                   | 3081931   | -7.1 | -7.6  | -6.8 |
| 233 | Saperconazole                                                                                                                                   | 457278    | -7.8 | -10.8 | -7   |
| 234 | Ent-Chromazonarol                                                                                                                               | 11674059  | -7.3 | -8.7  | -6.7 |
| 235 | Conckurchine                                                                                                                                    | 76330309  | -7.2 | -9    | -6.9 |
| 236 | cis-3,4-Dihydrohamacanthin B                                                                                                                    | 10624851  | -8   | -9.3  | -6.9 |
| 237 | Isoquercitrin                                                                                                                                   | 5280804   | -7.4 | -8.3  | -6.1 |
| 238 | Haliclonacyclamine C                                                                                                                            | 102124133 | -8   | -7.4  | -6.9 |
| 239 | (+)-Agelasine D                                                                                                                                 | 11775481  | -7.8 | -8.6  | -6   |
| 240 | 9-Methyl-7-[(E)-3,7,11,15-tetramethylhexadec-2-enyl]purin-7-ium-6-amine                                                                         | 44429795  | -6.1 | -6.8  | -5.1 |
| 241 | Tjipanazole A1                                                                                                                                  | 10050435  | -7.6 | -8.1  | -7   |
| 242 | Hesperidin                                                                                                                                      | 10621     | -8   | -10   | -8   |
| 243 | Piperine                                                                                                                                        | 638024    | -7.2 | -8.4  | -6.3 |
| 244 | Rutin trihydrate                                                                                                                                | 16218542  | -7.2 | -8    | -6.6 |
| 245 | Caryophyllene oxide                                                                                                                             | 1742210   | -5.6 | -7.3  | -5.3 |
| 246 | Riboflavin                                                                                                                                      | 493570    | -6.7 | -6.3  | -6.1 |
| 247 | Folic Acid                                                                                                                                      | 135398658 | -7.1 | -8.7  | -6.6 |
| 248 | Murrayanine                                                                                                                                     | 96942     | -6   | -7.3  | -5.7 |
| 249 | Isomurrayafoline B                                                                                                                              | 375146    | -6.5 | -7.5  | -6   |
| 250 | Girinimbine                                                                                                                                     | 96943     | -6.9 | -9.2  | -6.6 |
| 251 | Tetrahydrohaliclonacyclamine A                                                                                                                  | 46894059  | -8.2 | -8.2  | -8.2 |
| 252 | 2-[[2-[[2-(2,6-Diaminohexanoylamino)-3-(4-hydroxyphenyl)propanoyl]amino]-3-(1H-imidazol-5-yl)propanoyl]amino]propanoic acid                     | 18309602  | -6.3 | -6.2  | -5.7 |
| 253 | (2R,4S)-2-Amino-4-[[4-[(2-amino-4-oxo-1H-pteridin-6-yl)methylamino]benzoyl]amino]-2-[(4-hydroxy-3,5-diiodophenyl)methyl]-3-oxoheptanedioic acid | 136023163 | -6.7 | -6.8  | -6.8 |
| 254 | Halicyclamine B                                                                                                                                 | 10628970  | -7.5 | -6.6  | -6.6 |
| 255 | Neopterin                                                                                                                                       | 135408877 | -6.4 | -5.6  | -5.1 |
| 256 | Pteric acid                                                                                                                                     | 135398749 | -6.1 | -6.2  | -6.4 |
| 257 | 2 Deoxy D glucose                                                                                                                               | 108223    | -4.9 | -4.3  | -4.1 |
| 258 | Neopetrosiamine A                                                                                                                               | 49765082  | -7.4 | -6.7  | -6.7 |
| 259 | Haliclonacyclamine B                                                                                                                            | 102124134 | -9.2 | -6.9  | -6.9 |
| 260 | (GlcNAc) <sub>2</sub> (Man) <sub>3</sub> (Xyl) <sub>1</sub>                                                                                     | 71297386  | -6   | -6    | -5.8 |
| 261 | Cudraxanthone S                                                                                                                                 | 5495918   | -6.8 | -8.3  | -6.6 |
| 262 | Cudraflavanone B                                                                                                                                | 509244    | -6.5 | -7.7  | -6.3 |
| 263 | Cupressotropolone A                                                                                                                             | 10087743  | -6.4 | -7.5  | -6.1 |
| 264 | Cupressotropolone B                                                                                                                             | 10001595  | -6.6 | -7.8  | -6   |

|     |                                                                                     |          |       |       |      |
|-----|-------------------------------------------------------------------------------------|----------|-------|-------|------|
| 265 | 1-[2',3'-dihydroxy-5'-(hydroxymethyl)phenyl]-3-methyl-but-2-ene                     | 9990627  | -5.7  | -6.5  | -5.4 |
| 266 | Moschamine                                                                          | 5969616  | -7.1  | -8.1  | -6.5 |
| 267 | 5-(8'-Z-heptadecenyl)resorcinol                                                     | 53774196 | -5.2  | -5.7  | -4.6 |
| 268 | Buddledin A                                                                         | 5281514  | -5.9  | -7    | -5.4 |
| 269 | Buddledin B                                                                         | 6443194  | -5.6  | -7.3  | -5.5 |
| 270 | Pestafolide A                                                                       | 24850054 | -6.5  | -7.7  | -6   |
| 271 | Pestaphthalide A                                                                    | 24850093 | -5.6  | -6.7  | -5.1 |
| 272 | Pestaphthalide B                                                                    | 24850094 | -6.1  | -6.3  | -5   |
| 273 | Phaeosphenone                                                                       | 24970762 | -8    | -8.8  | -8.2 |
| 274 | 4-Terpenyl Cannabinolate                                                            | 24850050 | -7.4  | -7.9  | -6.3 |
| 275 | 4-(Furan-3-yl)benzaldehyde                                                          | 21526045 | -5.5  | -6.1  | -4.9 |
| 276 | 4-(5-oxotetrahydrofuran-3-yl)benzaldehyde                                           | 14863055 | -6.9  | -6.8  | -5.3 |
| 277 | Solanapyrone J                                                                      | 23625389 | -6.1  | -7.9  | -6   |
| 278 | 8alpha-O-(4-Hydroxy-2-methylenebutanoyloxy)-11beta,13-dihydro-4-epi-sonchucarpolide | 24178999 | -6.4  | -7.7  | -5.8 |
| 279 | 8alpha-O-(4-Hydroxy-2-methylenebutanoyloxy)-11beta,13-dihydrosonchucarpolide        | 24178998 | -6.9  | -7.4  | -5.9 |
| 280 | Neopeltolide                                                                        | 16115403 | -6.6  | -7.1  | -6.1 |
| 281 | Gentirigeoside A                                                                    | 44422964 | -6.6  | -7.1  | -6.8 |
| 282 | (-)-Rotiorin                                                                        | 11574449 | -7.4  | -7.5  | -6.1 |
| 283 | Anthecotulide                                                                       | 11962174 | -4.9  | -6.9  | -5.4 |
| 284 | acetoxyanthecotulide                                                                | 11522381 | -5.6  | -5.9  | -5.6 |
| 285 | 6-Epi-oxysporidinone                                                                | 54677669 | -6.9  | -6.9  | -6.1 |
| 286 | Andrographatoside                                                                   | 11533372 | -6.2  | -7.8  | -6   |
| 287 | Latrunclin T                                                                        | 15939613 | -5.5  | -6.6  | -4.9 |
| 288 | Carneic acid A                                                                      | 16083152 | -6.5  | -7.3  | -5.8 |
| 289 | Carneic acid B                                                                      | 16083153 | -6.6  | -7.2  | -5.9 |
| 290 | Cinnamodial                                                                         | 442354   | -5.3  | -6.9  | -5.1 |
| 291 | Cinnamosmolide                                                                      | 12303262 | -6.7  | -6.5  | -5.5 |
| 292 | Resorstatin                                                                         | 198749   | -5.8  | -6.5  | -5.1 |
| 293 | Rotiorinol A                                                                        | 11617875 | -6.3  | -8.6  | -6.1 |
| 294 | Epi-isochromophilone II                                                             | 11661102 | -7.2  | -7.9  | -6.1 |
| 295 | Chrysotrione A                                                                      | 16104929 | -5    | -5.8  | -4.8 |
| 296 | Manzamine E                                                                         | 44445401 | -8.3  | -8.8  | -7.8 |
| 297 | Musanolone C                                                                        | 10804574 | -6.9  | -8.1  | -7.3 |
| 298 | Andrographolide                                                                     | 5318517  | -6.8  | -8    | -6.1 |
| 299 | 6-Deoxymanzamine X                                                                  | 44445400 | -8.8  | -9.2  | -8.1 |
| 300 | 12,28-Oxamanzamine A                                                                | 11272782 | -10.2 | -10.9 | -8.6 |
